# Supplementary material
Source: Research Square preprint supplement (doi:10.21203/rs.3.rs-9644209/v1)
Supplement: Supplementary file 1 [file 0c74d9bed925bb204f71bfd6.xlsx]

## Sheet: Sheet1
TableS3. Analysis of the mediation by Metabolic related indicators of the associations of AIP in EICU basedata
		Mediation effect (95% CI), P value
	Total effect	Direct effect	Indirect effect	Mediation
Glu	0.038(0.033,0.043)0	0.038(0.034,0.044)0	-0.001(-0.001,0)0.04	-2.1%
bun	0.037(0.03,0.043)0	0.027(0.021,0.033)0	0.01(0.008,0.011)0	25.8%
Cl	0.036(0.029,0.043)0	0.036(0.029,0.043)0	0(0,0)0.12	0.5%
Cr	0.037(0.031,0.045)0	0.031(0.025,0.039)0	0.007(0.006,0.008)0	18.2%
FIO2	0.037(0.03,0.043)0	0.037(0.03,0.043)0	0(0,0)0.8	0%
Lac	0.037(0.031,0.042)0	0.023(0.016,0.028)0	0.014(0.011,0.016)0	37.1%
Hb	0.037(0.029,0.043)0	0.036(0.029,0.043)0	0(0,0)0.36	0.3%
PCO2	0.037(0.032,0.042)0	0.036(0.031,0.041)0	0.001(0.001,0.001)0	2.6%
PLT	0.037(0.03,0.043)0	0.035(0.029,0.042)0	0.001(0.001,0.002)0	3.5%
PT	0.037(0.031,0.043)0	0.033(0.028,0.04)0	0.003(0.002,0.004)0	9%
TBIL	0.038(0.032,0.043)0	0.03(0.025,0.035)0	0.008(0.006,0.009)0	20.9%
WBC	0.037(0.031,0.042)0	0.035(0.029,0.04)0	0.002(0.001,0.003)0	4.9%
HR	0.038(0.032,0.045)0	0.033(0.027,0.041)0	0.005(0.004,0.006)0	12.6%
DAP	0.037(0.031,0.043)0	0.036(0.03,0.042)0	0.001(0.001,0.002)0	2.9%
MAP	0.037(0.029,0.043)0	0.035(0.026,0.041)0	0.002(0.002,0.003)0	6%
SAP	0.038(0.033,0.043)0	0.034(0.029,0.04)0	0.004(0.003,0.005)0	9.5%
RR	0.038(0.032,0.043)0	0.035(0.029,0.04)0	0.003(0.002,0.004)0	8.2%
