# Supplementary material
Source: Research Square preprint supplement (doi:10.21203/rs.3.rs-9644209/v1)
Supplement: Supplementary file 2 [file 5f320f334d373884405582eb.xlsx]

## Sheet: Sheet1
				Crue Model			Model1			Model2
Table 3 The relationship between AIP and in-hospital mortality in EICU database
Characterisitic	Exposure cutoff	Case (%)	OR	95%CI	P-value	OR	95%CI	P-value	OR	95%CI	P-value
AIP
AIP continuous			1.198	(1.118,1.285)	P < 0.001	1.253	(1.165,1.348)	P < 0.001	1.157	(1.034,1.294)	0.0108
AIP quantile
Q1(low)	< 0.81	896(24.99%)	Ref	Ref		Ref	Ref		Ref	Ref
Q2	0.81-< 1.46	895(24.97%)	1.232	(1.014,1.496)	0.036	1.308	(1.071,1.6)	0.0087	1.11	(0.83,1.485)	0.4802
Q3	1.46-< 2.1	896(24.99%)	1.428	(1.178,1.733)	P < 0.001	1.623	(1.329,1.984)	P < 0.001	1.348	(1.008,1.805)	0.0445
Q4(high)	≥ 2.1	898(25.05%)	1.574	(1.299,1.908)	P < 0.001	1.809	(1.479,2.216)	P < 0.001	1.452	(1.066,1.978)	0.0181
p for trend					P < 0.001			P < 0.001			0.0078
The model 1 was the crude model
The model 2 was adjusted by gender, age, Acute renal failure, Cerebrovascular disease, Circulatory system disease, Digestive disease, Endocrine disease, Hematological cancer, Hematological disease, Neurological disease, Non hematological cancer, Respiratory system disease, Urogenital disease
The model 3 was adjusted by gender, age, Acute renal failure, Cerebrovascular disease, Circulatory system disease, Digestive disease, Endocrine disease, Hematological cancer, Hematological disease, Neurological disease, Non hematological cancer, Respiratory system disease, Urogenital disease, HR, RR, SAP, DAP, MAP, FiO2, PaCO2, PLT, TBIL, Cr, WBC, pH, Lac, PT, APTT, Cl, Hb, Neuts, Monos
