# Supplementary material
Source: Research Square preprint supplement (doi:10.21203/rs.3.rs-9644209/v1)
Supplement: Supplementary file 3 [file 7c6c933b15221357fdb4b8fb.xlsx]

## Sheet: Sheet1
TableS2. Analysis of the mediation by Metabolic related indicators of the associations of AIP in MIMIC basedata
		Mediation effect (95% CI), P value
	Total effect	Direct effect	Indirect effect	Mediation
HR	0.053(0.041,0.067)0	0.055(0.043,0.068)0	-0.001(-0.004,0.002)0.32	-1.9%
RR	0.055(0.044,0.07)0	0.055(0.042,0.068)0	0(-0.001,0.002)0.56	0.9%
SAP	0.053(0.041,0.067)0	0.056(0.044,0.068)0	-0.003(-0.008,0.003)0.44	-4.8%
DAP	0.054(0.043,0.066)0	0.054(0.043,0.066)0	0(-0.001,0.001)0.56	0.3%
MAP	0.053(0.041,0.068)0	0.055(0.041,0.07)0	-0.002(-0.005,0.001)0.36	-3.7%
FiO2	0.052(0.036,0.066)0	0.039(0.026,0.054)0	0.013(0.006,0.02)0	24.9%
PaCO2	0.052(0.036,0.065)0	0.052(0.035,0.065)0	0(0,0.001)0.32	0.4%
PLT	0.052(0.036,0.065)0	0.047(0.032,0.06)0	0.005(0.003,0.007)0	9.5%
TBIL	0.052(0.036,0.067)0	0.041(0.025,0.055)0	0.012(0.008,0.015)0	22%
Cr	0.052(0.039,0.07)0	0.043(0.03,0.06)0	0.009(0.004,0.013)0	17.6%
WBC	0.051(0.038,0.065)0	0.049(0.036,0.061)0	0.002(-0.002,0.005)0.32	4.3%
pH	0.053(0.041,0.07)0	0.042(0.03,0.057)0	0.01(0.005,0.017)0	19.2%
Lac	0.053(0.04,0.068)0	0.019(0.009,0.031)0	0.034(0.025,0.042)0	63.6%
PT	0.054(0.039,0.064)0	0.05(0.037,0.06)0	0.004(-0.002,0.008)0.12	7.3%
APTT	0.054(0.039,0.068)0	0.054(0.042,0.068)0	0(-0.004,0.005)0.92	1%
Hb	0.051(0.039,0.064)0	0.05(0.039,0.063)0	0.001(0,0.002)0.08	1.5%
Glu	0.054(0.035,0.068)0	0.042(0.022,0.056)0	0.012(0.007,0.015)0	21.5%
Neuts	0.053(0.04,0.064)0	0.051(0.037,0.062)0	0.002(0,0.004)0.04	4.5%
Monos	0.053(0.037,0.068)0	0.052(0.036,0.067)0	0.001(0,0.002)0	1.7%
