# Supplementary material
Source: Research Square preprint supplement (doi:10.21203/rs.3.rs-9644209/v1)
Supplement: Supplementary file 4 [file 7f7bf01ef0bcdc36bd995113.xlsx]

## Sheet: Sheet1
table S1 AUROCs for predicting in-hospital mortality between AIP and other features within different time spans
		MIMIC						EICU
Time span	Predictor	AUC	CI_lower	CI_upper	Best_Cutoff	Sensitivity	Specificity	AUC	CI_lower	CI_upper	Best_Cutoff	Sensitivity	Specificity
0-24	FiO2	0.621579	0.600217	0.64294	57.5	0.681677	0.50663	0.530974	0.506688	0.555261	58	0.536503	0.508621
0-24	MAP	0.658093	0.633096	0.68309	67.5	0.560559	0.6678	0.621249	0.595621	0.646876	68.5	0.556876	0.63307
0-24	HR	0.613864	0.587259	0.640468	95.5	0.532609	0.687861	0.600558	0.57549	0.625627	100.5	0.572156	0.603249
0-24	RR	0.629339	0.602596	0.656083	21.5	0.614907	0.624617	0.636035	0.611819	0.660251	22.5	0.609508	0.60783
0-24	AIP	0.735599	0.713359	0.757839	1.335	0.604037	0.774566	0.659588	0.636453	0.682723	1.37778	0.556876	0.710204
0-24	PaCO2	0.508028	0.481649	0.534407	40.5	0.408385	0.651139	0.531862	0.50621	0.557514	37.65	0.565365	0.499375
0-48	FiO2	0.603115	0.582856	0.623373	47.5	0.647059	0.517733	0.541754	0.524708	0.5588	46.5	0.541941	0.513359
0-48	MAP	0.674159	0.652294	0.696023	70.5	0.657647	0.586472	0.619929	0.602253	0.637604	70.5	0.57977	0.594129
0-48	HR	0.611653	0.587779	0.635527	93.5	0.545882	0.66106	0.601408	0.583762	0.619053	100.5	0.560033	0.611619
0-48	RR	0.614467	0.590279	0.638655	21.5	0.574118	0.636197	0.615328	0.597943	0.632713	22.5	0.569901	0.615574
0-48	AIP	0.74658	0.726777	0.766383	1.465	0.776471	0.605119	0.651609	0.635086	0.668132	1.38363	0.611842	0.626384
0-48	PaCO2	0.499845	0.476238	0.523452	36.5	0.452941	0.570384	0.541889	0.523713	0.560065	36.05	0.513158	0.555282
0-72	FiO2	0.563482	0.543351	0.583613	42.5	0.590772	0.526275	0.546793	0.531527	0.562059	46.5	0.49557	0.573997
0-72	MAP	0.7198	0.700418	0.739183	70.5	0.68004	0.650309	0.617485	0.601829	0.63314	70.5	0.575316	0.599237
0-72	HR	0.621152	0.598564	0.64374	93.5	0.538616	0.688563	0.589957	0.574177	0.605737	100.5	0.542405	0.614763
0-72	RR	0.613614	0.590961	0.636266	21.5	0.567703	0.640649	0.607108	0.591541	0.622676	22.5	0.549367	0.618758
0-72	AIP	0.738081	0.719273	0.756889	1.445	0.742227	0.62558	0.643234	0.628466	0.658002	1.52729	0.596203	0.632014
0-72	PaCO2	0.494882	0.472765	0.517	38.5	0.460381	0.538253	0.547017	0.531037	0.562997	35.85	0.496203	0.578718
0-168	FiO2	0.529696	0.51079	0.548601	42.5	0.58913	0.479365	0.561467	0.549162	0.573772	46.5	0.506636	0.584313
0-168	MAP	0.736408	0.719336	0.753479	72.5	0.718116	0.646712	0.602212	0.589512	0.614911	70.5	0.544179	0.609521
0-168	HR	0.631182	0.611125	0.651239	92.5	0.547101	0.699773	0.57836	0.565684	0.591036	99.5	0.529769	0.602089
0-168	RR	0.587963	0.567481	0.608444	21.5	0.534783	0.650794	0.600313	0.587757	0.61287	21.5	0.588927	0.565733
0-168	AIP	0.720196	0.702838	0.737555	1.405	0.694203	0.652608	0.653041	0.641186	0.664896	1.52729	0.593857	0.655619
0-168	PaCO2	0.499985	0.480178	0.519792	38.5	0.483333	0.524263	0.52951	0.516555	0.542464	36.95	0.510049	0.541127
