# Supplementary material
Source: Research Square preprint supplement (doi:10.21203/rs.3.rs-9644209/v1)
Supplement: Supplementary file 5 [file c872158924a16558155d5627.xlsx]

## Sheet: Sheet1
Table 1. Patient Characteristics
Variable	N	MIMIC			p-value2	N	EICU			p-value2
		Overall	alive	death			Overall	alive	death
		N = 3,5851	N = 2,2051	N = 1,3801			N = 12,5941	N = 9,9571	N = 2,6371
Gender	3585	1,955 (55%)	1,209 (55%)	746 (54%)	0.65	12594	6,285 (50%)	4,989 (50%)	1,296 (49%)	0.38
Age	3585	67 (15)	65 (16)	69 (14)	<0.001	12594	66 (17)	64 (17)	72 (14)	<0.001
Acute renal failure	3585	475 (13%)	253 (11%)	222 (16%)	<0.001	---	---	---	---	---
Cerebrovascular disease	3585	247 (6.9%)	157 (7.1%)	90 (6.5%)	0.49	12594	45 (0.4%)	28 (0.3%)	17 (0.6%)	0.005
Circulatory system disease	3585	1,297 (36%)	881 (40%)	416 (30%)	<0.001	12594	194 (1.5%)	176 (1.8%)	18 (0.7%)	<0.001
Digestive disease	3585	890 (25%)	568 (26%)	322 (23%)	0.1	12594	473 (3.8%)	315 (3.2%)	158 (6.0%)	<0.001
Endocrine disease	3585	1,640 (46%)	1,039 (47%)	601 (44%)	0.037	12594	1,606 (13%)	1,245 (13%)	361 (14%)	0.1
Hematological cancer	3585	169 (4.7%)	92 (4.2%)	77 (5.6%)	0.053	12594	1,639 (13%)	1,179 (12%)	460 (17%)	<0.001
Hematological disease	3585	1,189 (33%)	823 (37%)	366 (27%)	<0.001	---	---	---	---	---
Neurological disease	3585	284 (7.9%)	200 (9.1%)	84 (6.1%)	0.001	12594	882 (7.0%)	675 (6.8%)	207 (7.8%)	0.055
Non hematological cancer	3585	104 (2.9%)	68 (3.1%)	36 (2.6%)	0.41	---	---	---	---	---
Respiratory system disease	3585	812 (23%)	559 (25%)	253 (18%)	<0.001	12594	5,978 (47%)	4,292 (43%)	1,686 (64%)	<0.001
Urogenital disease	3585	389 (11%)	264 (12%)	125 (9.1%)	0.006	---	---	---	---	---
Dopamine	3585	157 (4.4%)	83 (3.8%)	74 (5.4%)	0.023	12594	341 (2.7%)	147 (1.5%)	194 (7.4%)	<0.001
Epinephrine	3585	143 (4.0%)	37 (1.7%)	106 (7.7%)	<0.001	12594	280 (2.2%)	22 (0.2%)	258 (9.8%)	<0.001
Norepinephrine	3585	3,220 (90%)	2,050 (93%)	1,170 (85%)	<0.001	12594	2,767 (22%)	1,556 (16%)	1,211 (46%)	<0.001
vasopressin	---	---	---	---	---	12594	842 (6.7%)	155 (1.6%)	687 (26%)	<0.001
Dobutamine	3585	48 (1.3%)	24 (1.1%)	24 (1.7%)	0.1	---	---	---	---	---
Milrinone	3585	17 (0.5%)	11 (0.5%)	6 (0.4%)	0.79	---	---	---	---	---
HR(bpm)	3585	88 (22)	85 (16)	92 (29)	<0.001	12594	96 (21)	95 (20)	101 (23)	<0.001
RR(bpm)	3585	20 (7)	20 (6)	21 (9)	<0.001	12594	22 (7)	22 (7)	24 (8)	<0.001
SAP(mmHg)	3585	108 (28)	117 (25)	95 (28)	<0.001	12594	112 (26)	114 (25)	104 (27)	<0.001
DAP(mmHg)	3585	58 (103)	62 (131)	52 (15)	<0.001	12594	63 (18)	63 (17)	60 (20)	<0.001
MAP(mmHg)	3585	75 (33)	81 (33)	65 (32)	<0.001	12594	76 (19)	77 (19)	71 (21)	<0.001
FiO2(%)	3585	52 (22)	46 (18)	61 (25)	<0.001	12594	67 (340)	63 (333)	78 (365)	<0.001
PaCO2(mmHg)	3585	40 (13)	41 (13)	40 (14)	0.023	12594	40 (14)	40 (14)	40 (16)	<0.001
PLT(10⁹/L)	3585	175 (117)	187 (111)	156 (122)	<0.001	12594	198 (106)	202 (102)	186 (120)	<0.001
TBIL(μmol/L)	3585	2.5 (5.3)	1.6 (3.7)	3.9 (7.0)	<0.001	12594	1.23 (2.36)	1.04 (1.92)	1.93 (3.49)	<0.001
Cr(μmol/L)	3585	1.82 (1.57)	1.48 (1.47)	2.38 (1.57)	<0.001	---	---	---	---	---
WBC(10⁹/L)	3585	14 (16)	11 (13)	18 (19)	<0.001	12594	15 (14)	14 (11)	19 (22)	<0.001
pH	3585	7.33 (0.13)	7.37 (0.10)	7.28 (0.14)	<0.001	---	---	---	---	---
Lac(mmol/L)	3585	3.2 (3.9)	1.5 (0.7)	5.9 (5.1)	<0.001	12594	2.65 (2.84)	2.08 (1.85)	4.81 (4.43)	<0.001
PT(s)	3585	20 (13)	17 (7)	25 (18)	<0.001	12594	20 (13)	19 (11)	24 (17)	<0.001
APTT(s)	3585	44 (24)	38 (18)	53 (29)	<0.001	---	---	---	---	---
Cl(mmol/L)	3585	104 (7)	105 (6)	102 (8)	<0.001	---	---	---	---	---
Hb(g/L)	3585	9.34 (1.73)	9.38 (1.59)	9.27 (1.94)	0.01	12594	8.90 (1.84)	9.95 (1.76)	8.72 (1.98)	<0.001
Glu(mmol/L)	3585	136 (73)	125 (50)	155 (97)	<0.001	---	---	---	---	---
Neuts(10⁹/L)	3585	13 (10)	12 (9)	15 (11)	<0.001	---	---	---	---	---
Monos(10⁹/L)	3585	0.86 (0.96)	0.80 (0.76)	0.95 (1.21)	0.041	---	---	---	---	---
Lymphs(10⁹/L)	3585	1.23 (2.06)	1.15 (1.84)	1.36 (2.38)	0.17	---	---	---	---	---
support	3585	1,498 (42%)	885 (40%)	613 (44%)	0.011	12594	2,417 (19%)	1,151 (12%)	1,266 (48%)	<0.001
TG(mg/dL)	3585	176 (187)	164 (159)	196 (222)	<0.001	12594	153 (204)	149 (189)	168 (251)	<0.001
HDL(mg/dL)	3585	33 (16)	34 (17)	32 (16)	0.005	12594	32 (17)	33 (17)	29 (16)	<0.001
AIP	3585	1.51 (0.98)	1.44 (0.97)	1.61 (0.97)	<0.001	12594	1.48 (1.02)	1.43 (1.01)	1.66 (1.07)	<0.001
1 Mean (sd) or Frequency (%)
2 Wilcoxon rank sum test; Pearson’s Chi-squared test
LDL, low density lipoprotein; Hb, hemoglobin; RDW, Red blood cell distribution width; LYM, lymphocyte; MONO, monocyte; PLT, platelet count; NEUT, Neutrophils; WBC, white blood cell; BUN, urea nitrogen; UA, uric acid; Cr, creatinine; TCHO, total cholesterol; AG, anion gap; Alb, albumin; TG, triglyceride; HDL, high density lipoprotein; GLU, Fasting blood glucose; BPS, systolic pressure; BPD, diasto…
