# Supplementary material
Source: Research Square preprint supplement (doi:10.21203/rs.3.rs-9644209/v1)
Supplement: Supplementary file 6 [file cc5affe952034f34641059ab.xlsx]

## Sheet: Sheet1
Table 2 The relationship between AIP and in-hospital mortality in MIMIC database
				Model1			Model2			Model3
Characterisitic	Exposure cutoff	Case (%)	OR	95%CI	P-value	OR	95%CI	P-value	OR	95%CI	P-value
AIP
AIP continuous			1.242	(1.193,1.294)	P < 0.001	1.265	(1.212,1.32)	P < 0.001	1.092	(1.039,1.147)	P < 0.001
AIP quantile
Q1(low)	< 0.76	3149(25%)	Ref	Ref		Ref	Ref		Ref	Ref
Q2	0.76-< 1.36	3147(24.99%)	1.155	(1.016,1.314)	0.0276	1.162	(1.018,1.326)	0.0265	0.996	(0.858,1.155)	0.9529
Q3	1.36-< 2.09	3147(24.99%)	1.328	(1.171,1.507)	P < 0.001	1.396	(1.226,1.591)	P < 0.001	1.057	(0.912,1.225)	0.4641
Q4(high)	≥ 2.09	3151(25.02%)	1.714	(1.517,1.938)	P < 0.001	1.771	(1.56,2.01)	P < 0.001	1.179	(1.02,1.363)	0.0258
p for trend					P < 0.001			P < 0.001			0.015
The model 1 was the crude model
The model 2 was adjusted by cerebrovasculardisease, circulatorysystemdisease, digestivedisease, endocrinedisease, hematologicalcancer, neurologicaldisease, respiratorysystemdisease, age, gender
The model 3 was adjusted by cerebrovasculardisease, circulatorysystemdisease, digestivedisease, endocrinedisease, hematologicalcancer, neurologicaldisease, respiratorysystemdisease, age, gender, Glu, bun, Cl, Cr, FIO2, Lac, Hb, PCO2, PLT, PT, TBIL, WBC, DAP, MAP, SAP, RR
